# Supplementary material for: Methylation and Loss of Secreted Frizzled-Related Protein 3 Enhances Melanoma Cell Migration and Invasion
Source: PubMed Central journal article supplement (PMC3072980; doi:10.1371/journal.pone.0018674), 2011-04-08

**Figure S2**

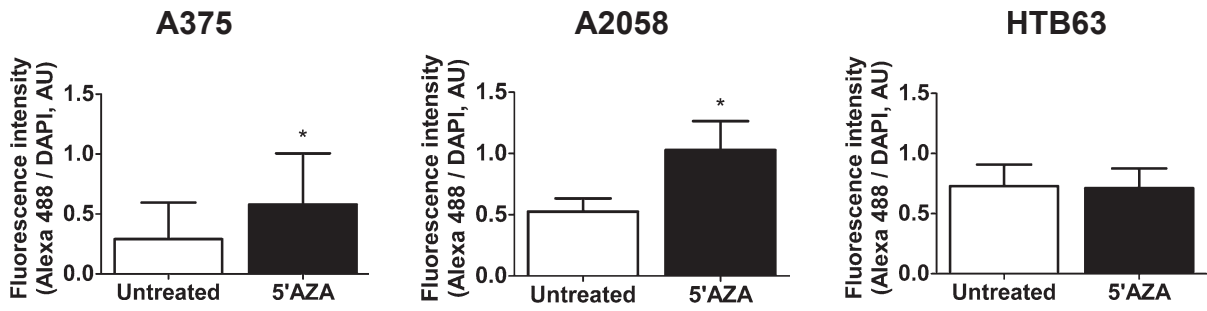

Supplement: pone.0018674.s002.pdf [file pone.0018674.s002.pdf]
